# Supplementary material
Source: PubMed Central journal article supplement (PMC4940070)
Supplement: supp_WNL.0000000000002834_Table_e-1.pdf [file supp_WNL.0000000000002834_Table_e-1.pdf]

**Table e-1. Multivariable results for association between research participation and outcomes of acute hospital care including those who were palliated during the admission**

| Model | Outcome                                 | Excluding stroke unit care from model |           |         |
|-------|-----------------------------------------|---------------------------------------|-----------|---------|
|       |                                         | aOR                                   | 95% CI    | p value |
| 1     | Died in hospital                        | 0.40                                  | 0.18-0.84 | 0.02    |
| 2     | Independence on discharge <sup>^</sup>  | 0.97                                  | 0.70-1.33 | 0.84    |
| 3     | Discharged home*                        | 0.81                                  | 0.60-1.10 | 0.17    |
| 4     | Discharged to inpatient rehabilitation* | 1.47                                  | 1.12-1.95 | 0.006   |
| 5     | Discharged to aged care facility*       | 0.92                                  | 0.51-1.65 | 0.77    |

aOR- adjusted odds ratio; CI- confidence interval; <sup>^</sup>mRS 0-2; \*Each discharge

destination tested against all other destinations (excluding death); Independent variables in model included: hospital location, hospital stroke admission numbers, age, sex, history of hypertension and hypercholesterolaemia, independence prior to stroke, living at home prior to stroke, ischaemic stroke, arm weakness, speech deficit, inability to walk on admission, incontinence within 72 hours
